# Supplementary material
Source: MDPI journal article supplement (https://www.mdpi.com/2071-1050/15/17/13279)
Supplement: s1 [file s1]

## Supplementary Materials

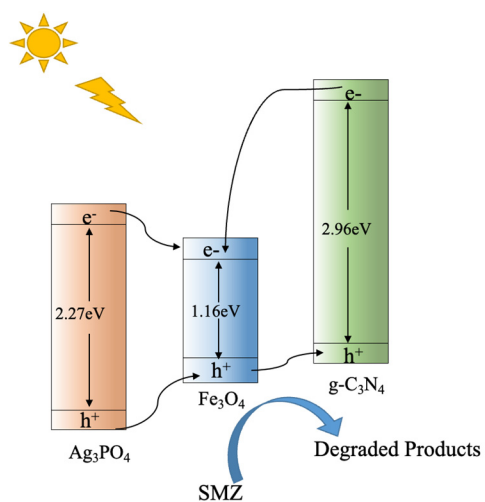

**Figure S1.** The photocatalytic degradation mechanism diagram of  $\text{Fe}_3\text{O}_4/\text{Ag}_3\text{P}_2\text{O}_4/\text{g-C}_3\text{N}_4$ .
